# Supplementary material for: Genome-Wide Identification and Expression Profile Reveal Potential Roles of Peanut ZIP Family Genes in Zinc/Iron-Deficiency Tolerance
Source: MDPI journal article supplement (doi:10.3390/plants11060786), 2022-03-16
Supplement: s1 [file s1]

Supplementary Material

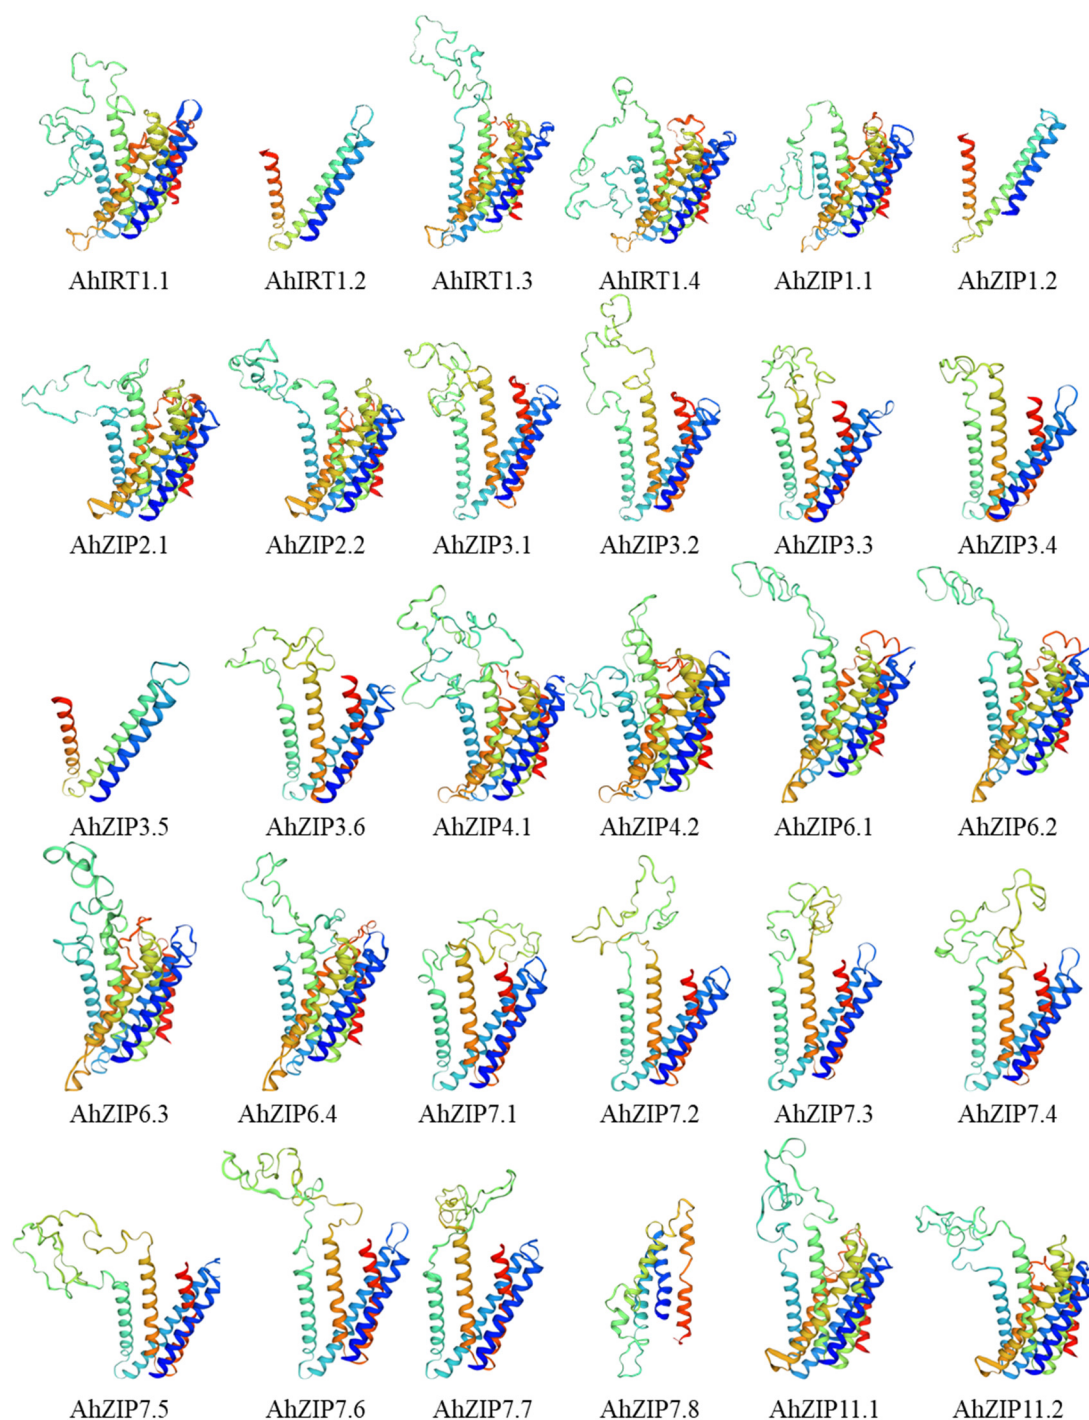

**Figure S1.** Predicted 3D structure of peanut AhZIP proteins using the SwissModel. Models were visualized in rainbow color from N to C termini.
